# Supplementary material for: Structures of chaperone-substrate complexes docked onto the export gate in a type III secretion system
Source: PubMed Central journal article supplement (PMC5932034; doi:10.1038/s41467-018-04137-4), 2018-05-02
Supplement: 41467_2018_4137_MOESM1_ESM.pdf [file 41467_2018_4137_MOESM1_ESM.pdf]

# **Supplementary Information for**

## **Structures of chaperone-substrate complexes docked onto the export gate in a type III secretion system**

Xing et al.

### **This file includes:**

Supplementary Figures 1-11

Supplementary Tables 1-3

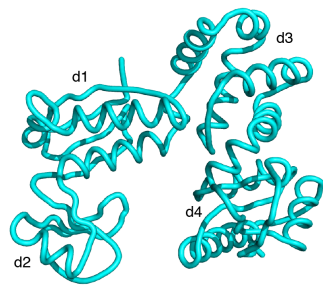

FlhA<sup>C</sup> *S. enterica* (PDB ID 6CH1)  
cleft opening: 12 Å

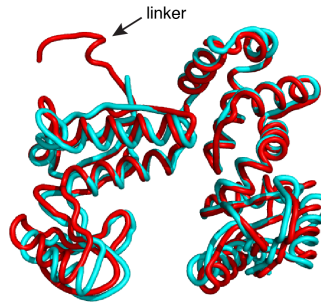

FlhA<sup>C-link</sup> *S. enterica* (PDB ID 3A5I)  
Z: 41.7, RMSD: 2 Å, Identity: 100%  
cleft opening: 16.7 Å

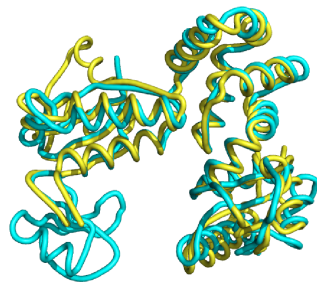

FlhA<sup>C-link</sup> *B. subtilis* (PDB ID 3MIX)  
Z: 32.2, RMSD: 3.2 Å, Identity: 34%  
cleft opening: d2 domain not visible

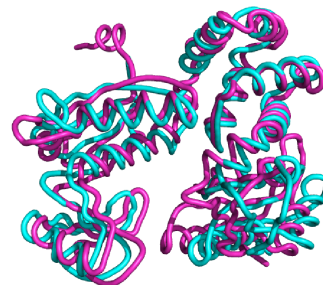

FlhA<sup>C-link</sup> *H. pylori* (PDB ID 3MYD)  
Z: 32.5, RMSD: 3.7 Å, Identity: 38%  
cleft opening: 6.5 Å

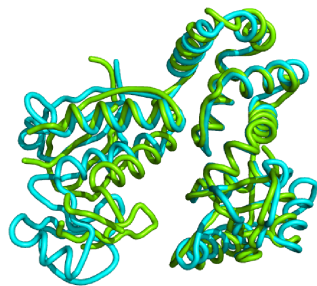

InvA<sup>C</sup> *S. enterica* (PDB ID 2X49)  
Z: 24.2, RMSD: 5.3 Å, Identity: 23%  
cleft opening: 5.9 Å

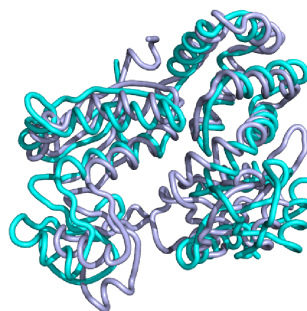

MxiA *S. flexneri* (PDB ID 4A5P)  
Z: 25.8, RMSD: 3.8 Å, Identity: 24%  
cleft opening: 7.5 Å

### Supplementary Figure 1. Structural similarity between FlhA and its homologs.

Superposition of the crystal structure of FlhA<sup>C</sup> (in cyan) on the structure of FlhA proteins from other species and the homologous proteins InvA and MxiA from pathogenic T3SSs. The Z score, Ca rmsd and identity percentage were calculated by the Dali server ([http://ekhidna.biocenter.helsinki.fi/dali\\_server](http://ekhidna.biocenter.helsinki.fi/dali_server)). Cleft opening was measured as the distance between the nearest residues in the d2 and d4 domains.

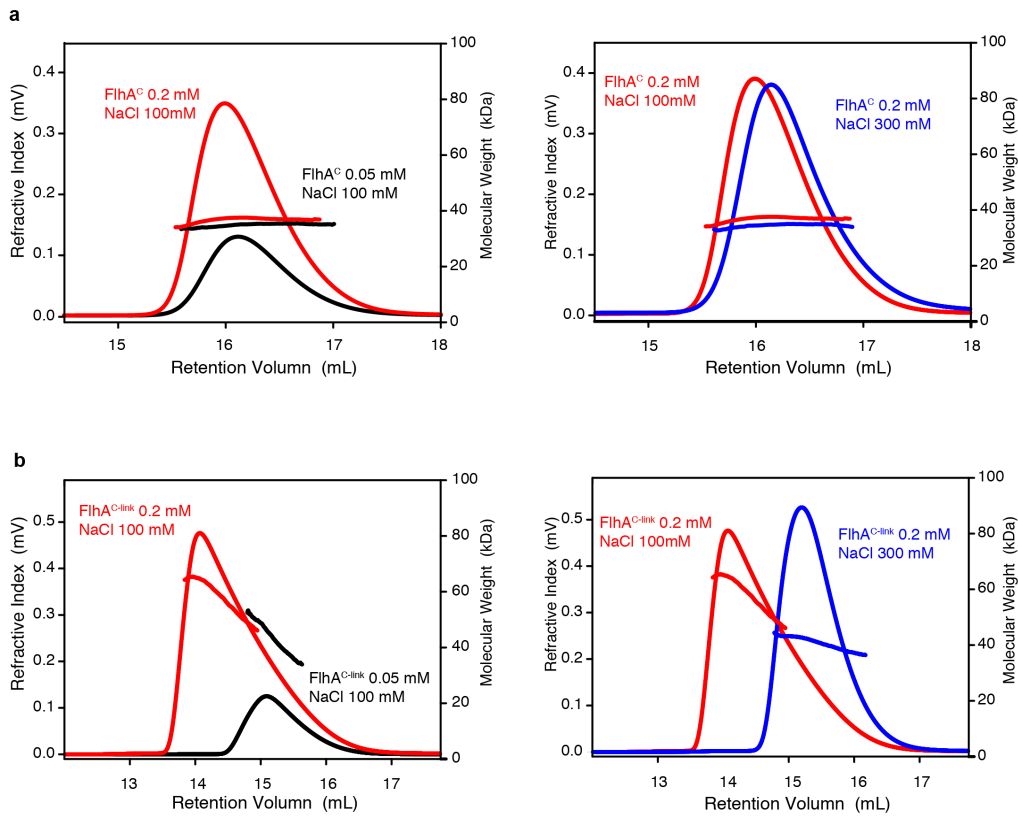

### Supplementary Figure 2. Oligomerization of FlhA<sup>C</sup>.

**(a)** SEC-MALS profiles of FlhA<sup>C</sup> in two different protein concentrations and salt concentrations. FlhA<sup>C</sup> elutes as a monomer. **(b)** SEC-MALS profiles of FlhA<sup>C-link</sup> in two different protein concentrations and salt concentrations. FlhA<sup>C-link</sup> elutes as a dimer under physiological salt concentrations. Because dimerization is mediated almost exclusively by means of electrostatic interactions, higher salt concentrations disrupt FlhA<sup>C</sup> dimerization. FlhA<sup>C</sup> is in fast equilibrium between a monomeric and dimeric state.

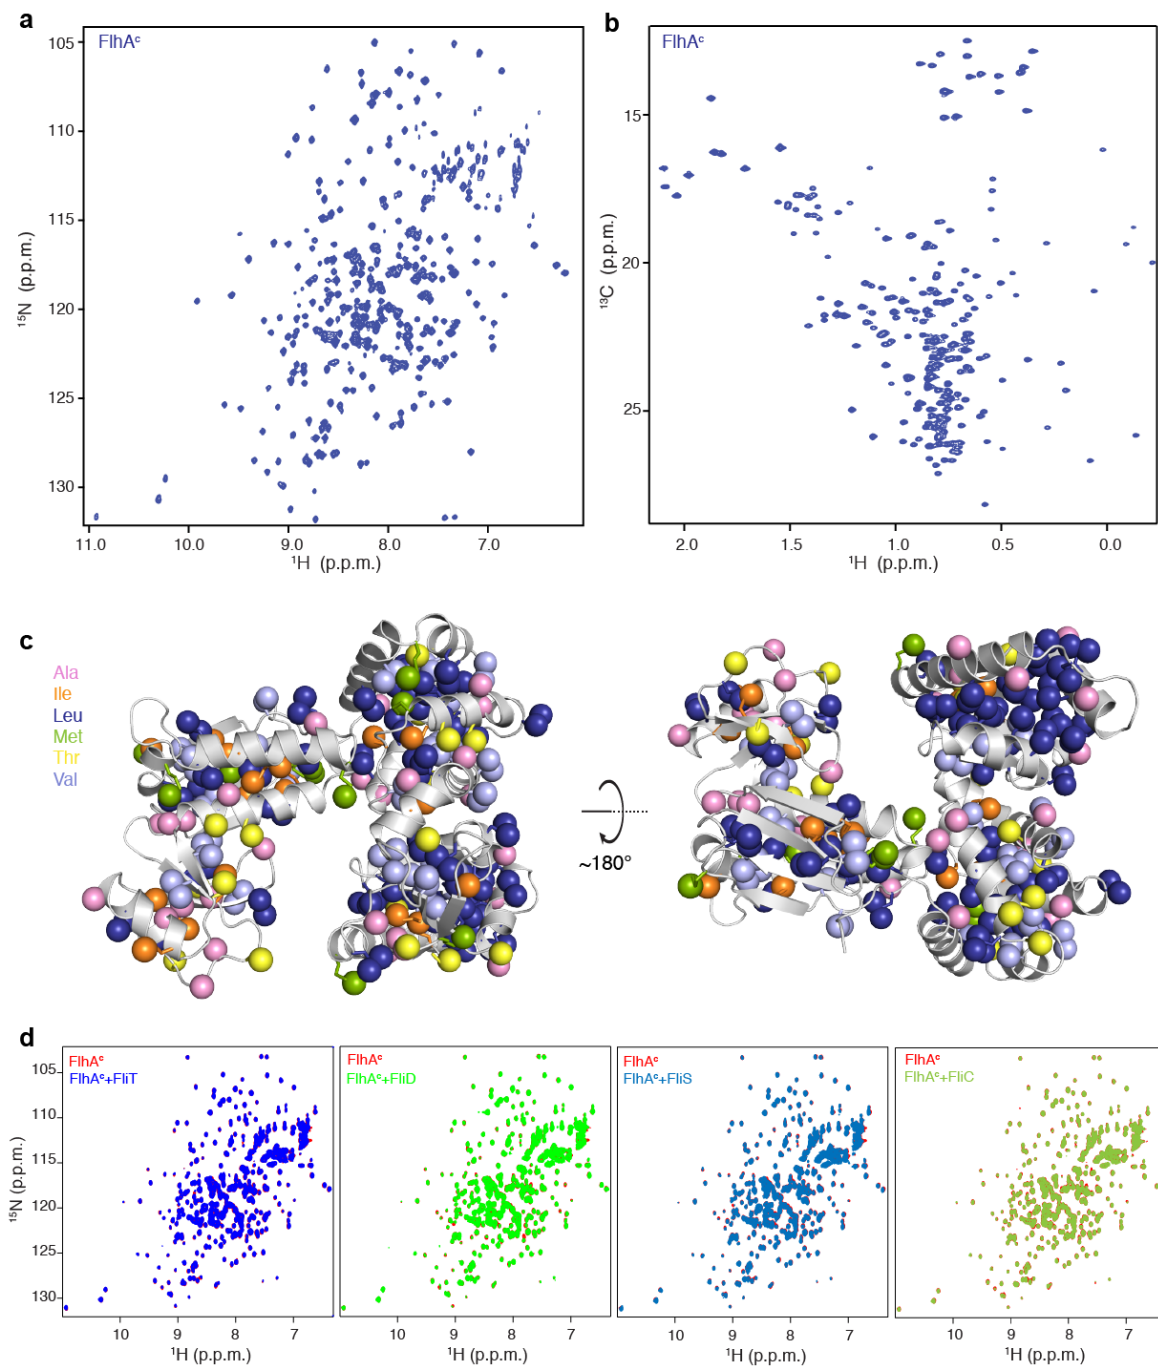

### Supplementary Figure 3. NMR characterization of FlhA<sup>C</sup>.

**(a,b)** <sup>1</sup>H-<sup>15</sup>N transverse relaxation-optimized (TROSY) spectra (a) and <sup>1</sup>H-<sup>13</sup>C HMQC spectra (b) of U-2H, Ala-<sup>13</sup>CH<sub>3</sub>, Met-<sup>13</sup>CH<sub>3</sub>, Ile-δ<sup>1</sup>-<sup>13</sup>CH<sub>3</sub>, Leu, Val-<sup>13</sup>CH<sub>3</sub> and Thr-<sup>13</sup>CH<sub>3</sub> labeled FlhA<sup>c</sup>. **(c)** Distribution of methyl-bearing amino acids in FlhA<sup>c</sup>. **(d)** <sup>1</sup>H-<sup>15</sup>N TROSY spectra of FlhA<sup>c</sup> (0.4 mM) titrated, at a molar ratio 1:2, with free FliT and FliS chaperones, and free FliD and FliC substrates.

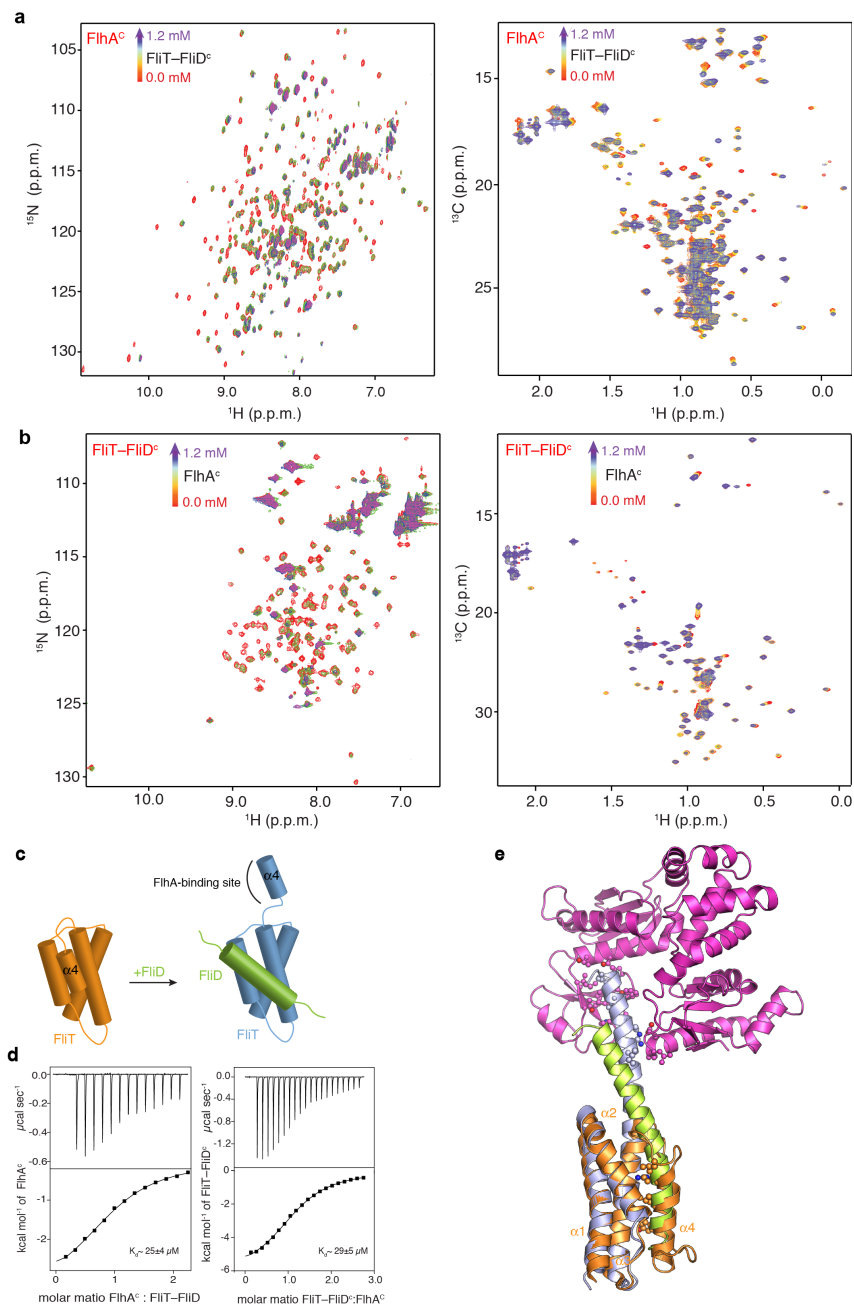

### Supplementary Figure 4. Interaction of FlhA<sup>C</sup> with FliT–FliD.

**(a)** Titration of unlabeled FliT–FliD<sup>C</sup> to isotopically labeled FlhA<sup>C</sup>. The stepwise process was monitored by recording <sup>1</sup>H-<sup>15</sup>N TROSY HSQC and <sup>1</sup>H-<sup>13</sup>C methyl HMQC spectra. **(b)** The reverse titration was similarly monitored by NMR. **(c)** A cartoon depicting how FliD binding to FliT activates it for binding to FlhA by releasing helix α4. **(d)** ITC profiles of FlhA<sup>C</sup> binding to FliT–FliD, which includes the full-length FliD construct, and FliT–FliD<sup>C</sup>. The data showed that increasing the length of FliD to encompass additional residues outside the FliT-binding site has no effect on the binding affinity. The K<sub>d</sub> values are average of a triplicate experiment. **(e)** Superposition of free FliT (orange) on the FliT molecule in the ternary complex (light blue).

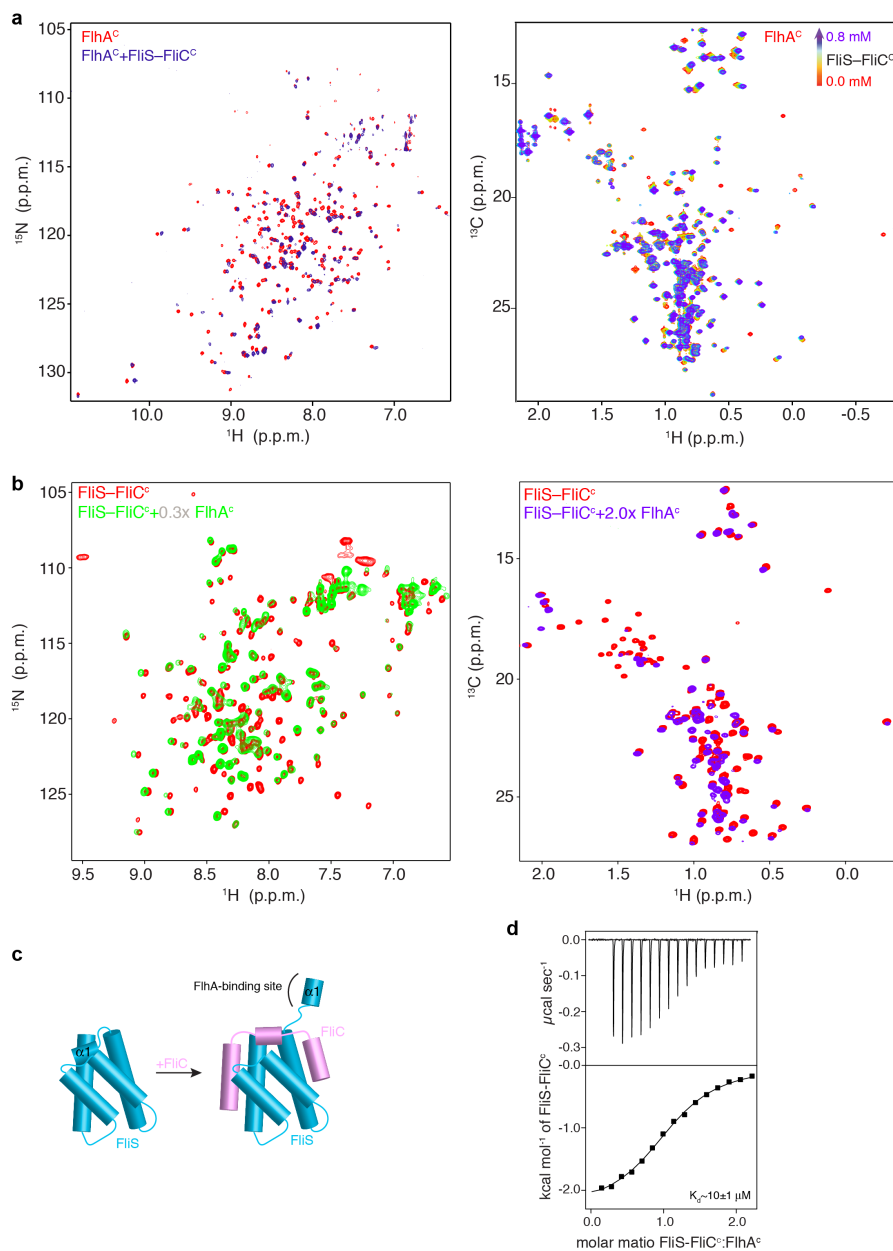

### Supplementary Figure 5. Interaction of FlhA<sup>C</sup> with FliS–FliC.

**(a)** Titration of unlabeled FliS–FliC<sup>C</sup> to isotopically labeled FlhA<sup>C</sup>. The stepwise process was monitored by recording <sup>1</sup>H-<sup>15</sup>N TROSY HSQC and <sup>1</sup>H-<sup>13</sup>C methyl HMQC spectra. **(b)** The reverse titration was similarly monitored by NMR. **(c)** A cartoon depicting how FliC binding to FliS activates it for binding to FlhA by releasing helix α1. **(d)** ITC profile of FlhA<sup>C</sup> binding to FliS–FliC<sup>C</sup>. The K<sub>d</sub> value is average of a triplicate experiment.

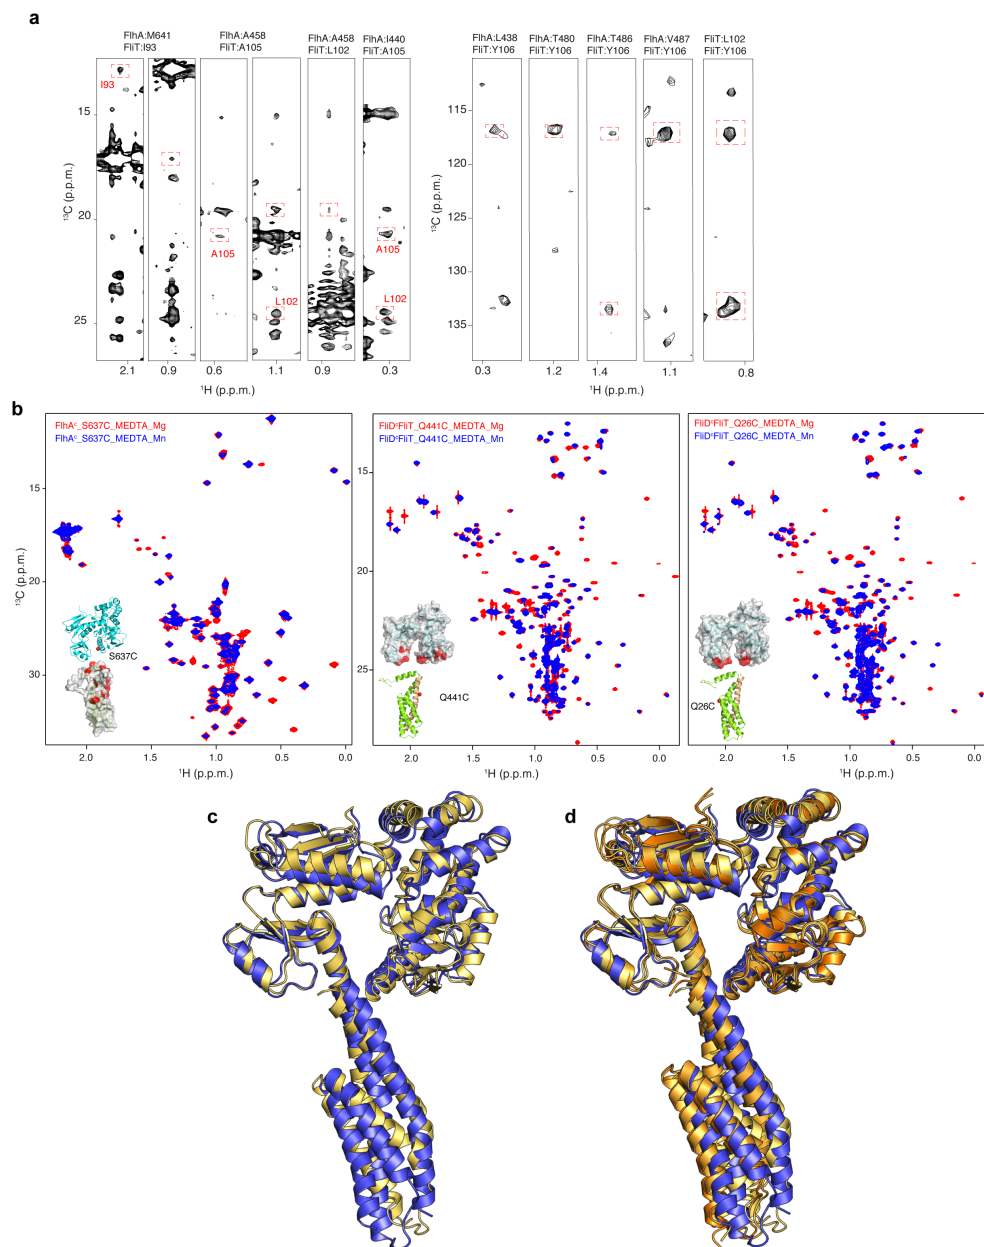

### Supplementary Figure 6. NMR structure determination of the FlhA<sup>C</sup>-FliT<sup>C</sup>-FliD<sup>C</sup> ternary complex

**(a)** Representative NOESY strips showing intermolecular NOEs between FlhA<sup>C</sup> and FliT in the ternary complex. **(b)** <sup>1</sup>H-<sup>13</sup>C methyl HMQC spectra of FlhA<sup>C</sup> (or FliT-FliD<sup>C</sup>) bound to FliT-FliD<sup>C</sup> (or FlhA<sup>C</sup>) that is conjugated with diamagnetic (Mg<sup>+2</sup>) or paramagnetic (Mn<sup>+2</sup>) probe for the measurement of PRE rates in the ternary complex. The single-cysteine positions where the probe was incorporated are shown. **(c)** Superposition of the NMR solution structure (blue) with the crystal structure (light orange), both determined in this work. **(d)** Three FlhA<sup>C</sup> molecules were present in the asymmetric unit, which are superimposed on the NMR structure. The comparison indicates the variation in the long helices of FliT and FliD located away from the binding site, highlighting the increased flexibility of these helices.

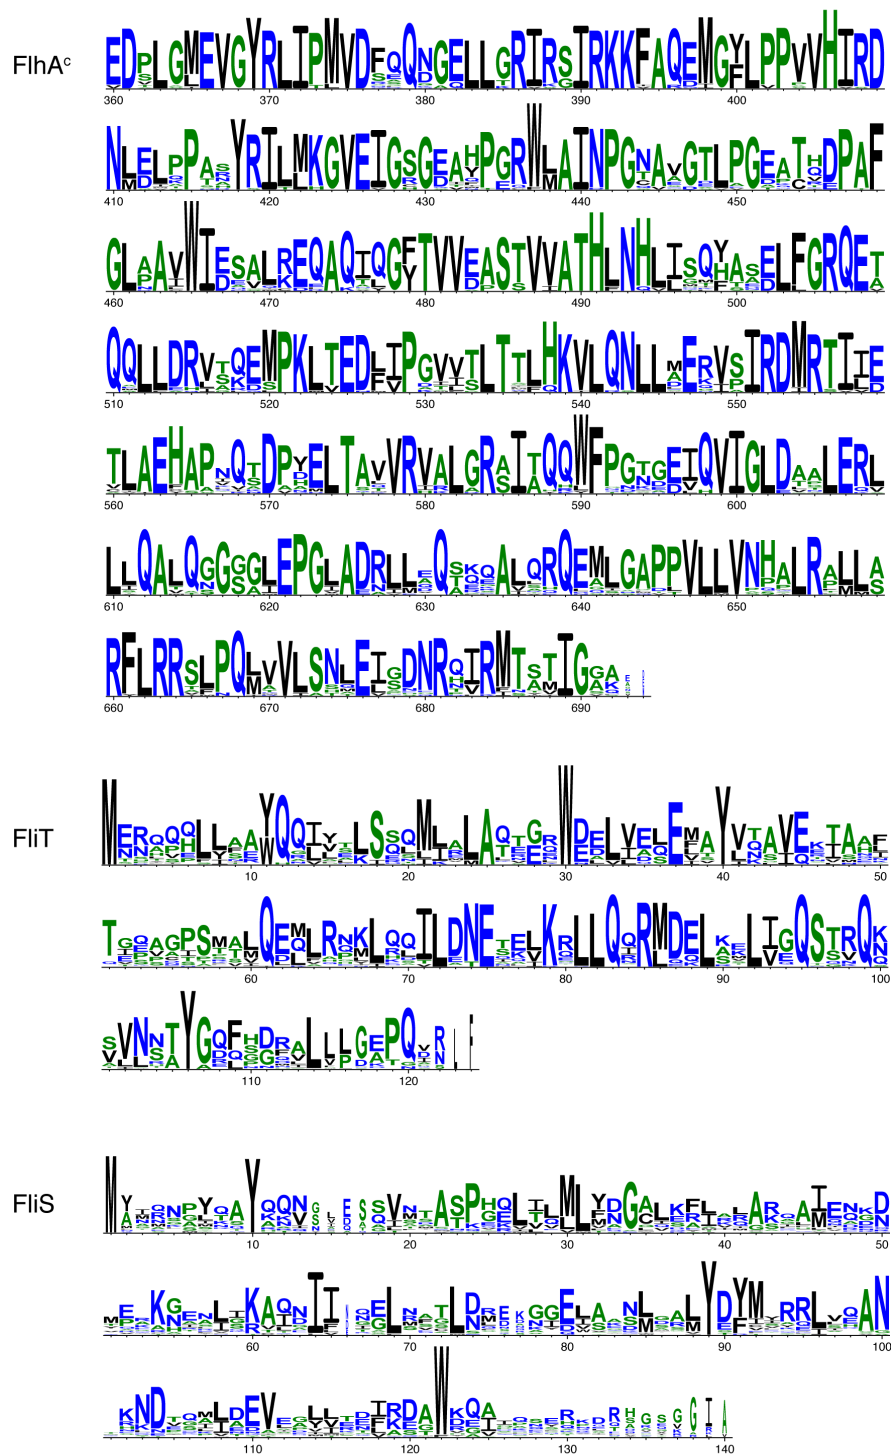

**Supplementary Figure 7. Sequence conservation of FliA<sup>c</sup>, FliT and FliS.**

Sequence logo of the proteins was created from a collection of aligned sequences. 40 unique sequences were used and the sequence of *Salmonella enterica* is shown.



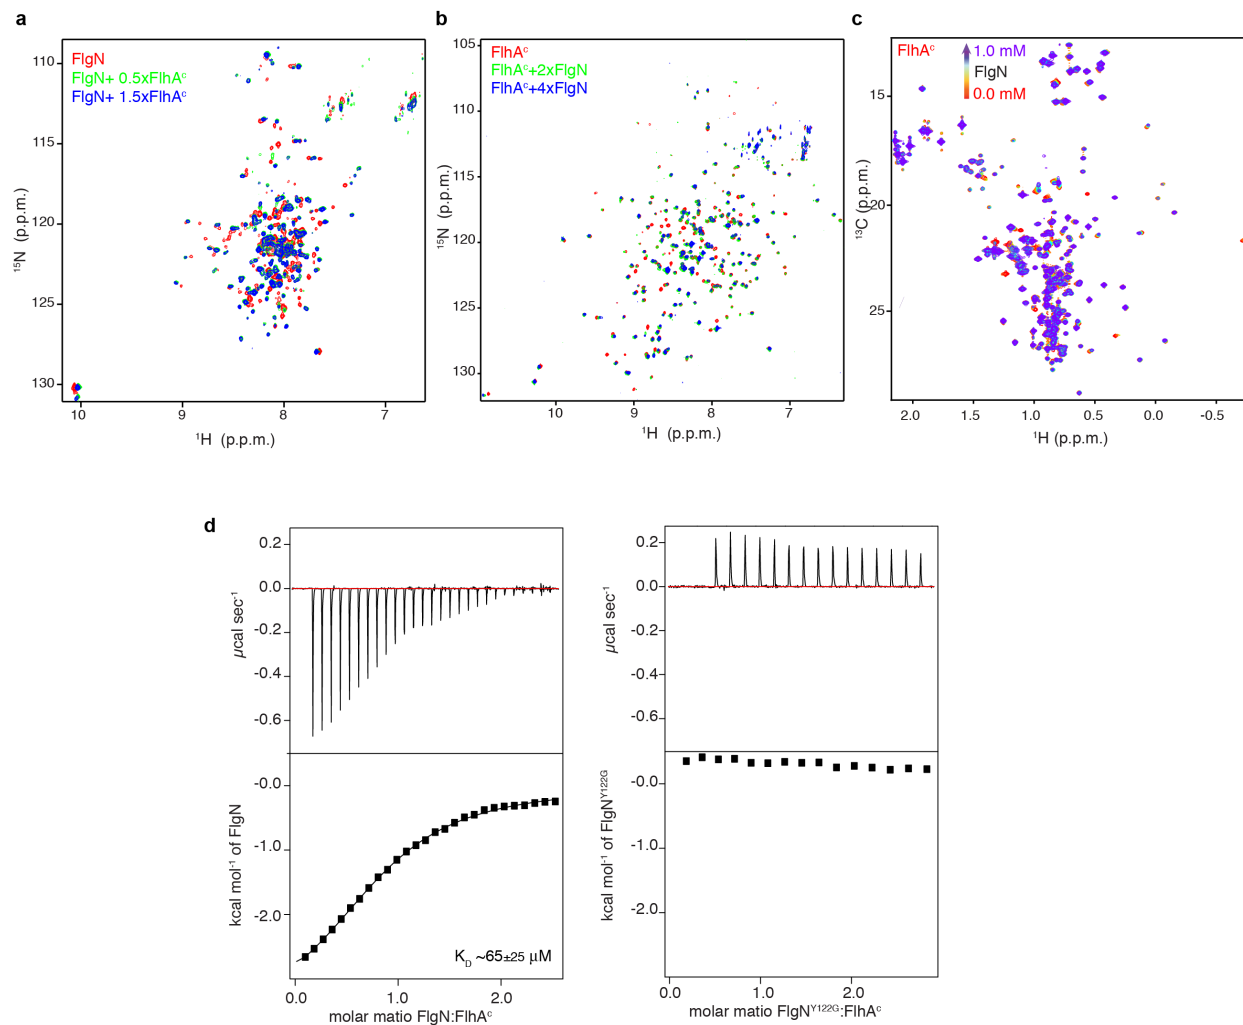

### Supplementary Figure 8. Interaction of FlhA<sup>C</sup> with FlgN.

**(a)** <sup>1</sup>H-<sup>15</sup>N TROSY HSQC spectra of <sup>15</sup>N-labeled FlgN titrated with unlabeled FlhA<sup>C</sup>. **(b,c)** <sup>1</sup>H-<sup>15</sup>N TROSY HSQC (b) and <sup>1</sup>H-<sup>13</sup>C methyl HMQC (c) spectra of labeled FlhA<sup>C</sup> titrated with unlabeled FlgN. **(d)** ITC profiles of FlgN (left) and FlgN<sup>Y122G</sup> (right) binding to FlhA<sup>C</sup>. FlgN Tyr122 is very important for the formation of the ternary complex and its substitution results in abrogation of the binding. The  $K_D$  values are average of a triplicate experiment.

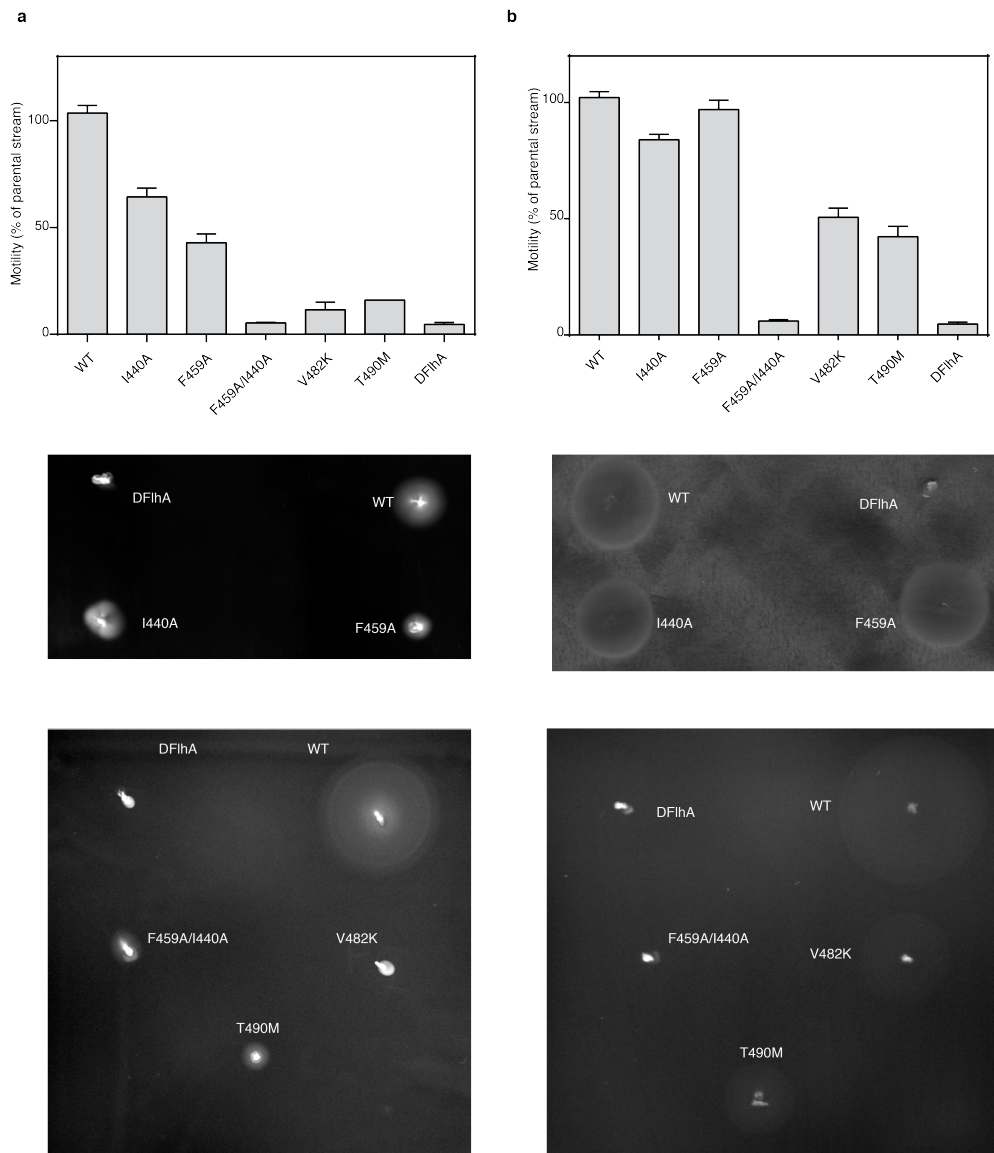

### Supplementary Figure 9. Bacterial motility assays

Motility of *Salmonella serovar typhimurium*  $\Delta flhA$  strain (FlhA-) with pkG116 plasmid containing FlhA, FlhA<sup>I440A</sup>, FlhA<sup>F459A</sup>, FlhA<sup>F459A/I440A</sup>, FlhA<sup>V482K</sup> or FlhA<sup>T490M</sup> in soft agar after incubation at 37 °C, 6 h without inducer (a) or with inducer added (b). FlhA or related FlhA mutant cloned into pkG116 plasmid was overexpressed by the addition of 5 mM IPTG into media. Bar graphs represent the mean value of the colony diameter and error bars represent standard deviation (n=6).

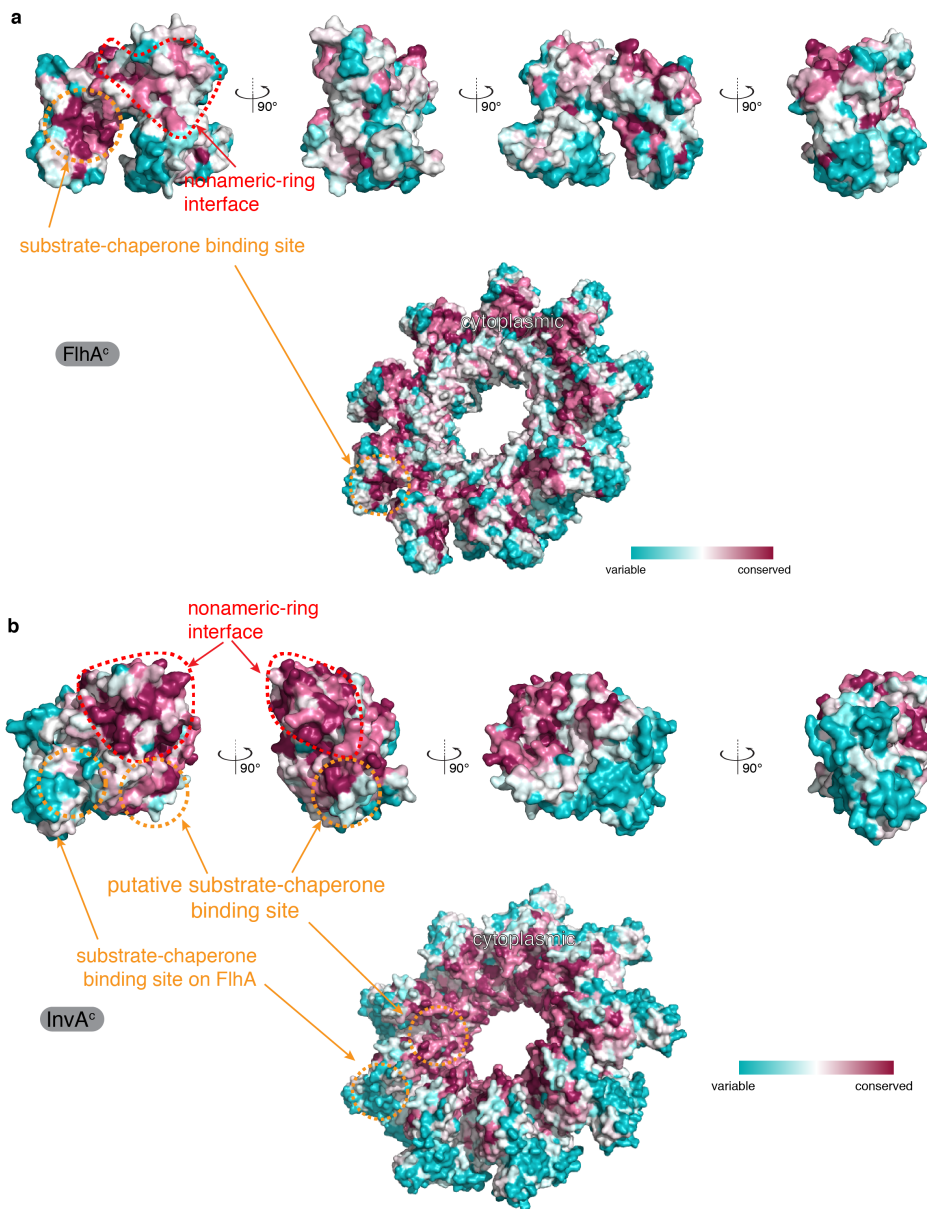

**Supplementary Figure 10. Sequence conservation in FlhA<sup>C</sup> and SctV<sup>C</sup>.**

**(a)** Sequence conservation of FlhA<sup>C</sup> colored according to residue identity conservation scores obtained by ConSurf. The oligomeric interface and the identified chaperone-substrate binding site are indicated.

**(b)** Sequence conservation of SctV<sup>C</sup> mapped on the structure of InvA<sup>C</sup> from *Salmonella*. The oligomeric interface and a putative chaperone-substrate binding site are indicated.

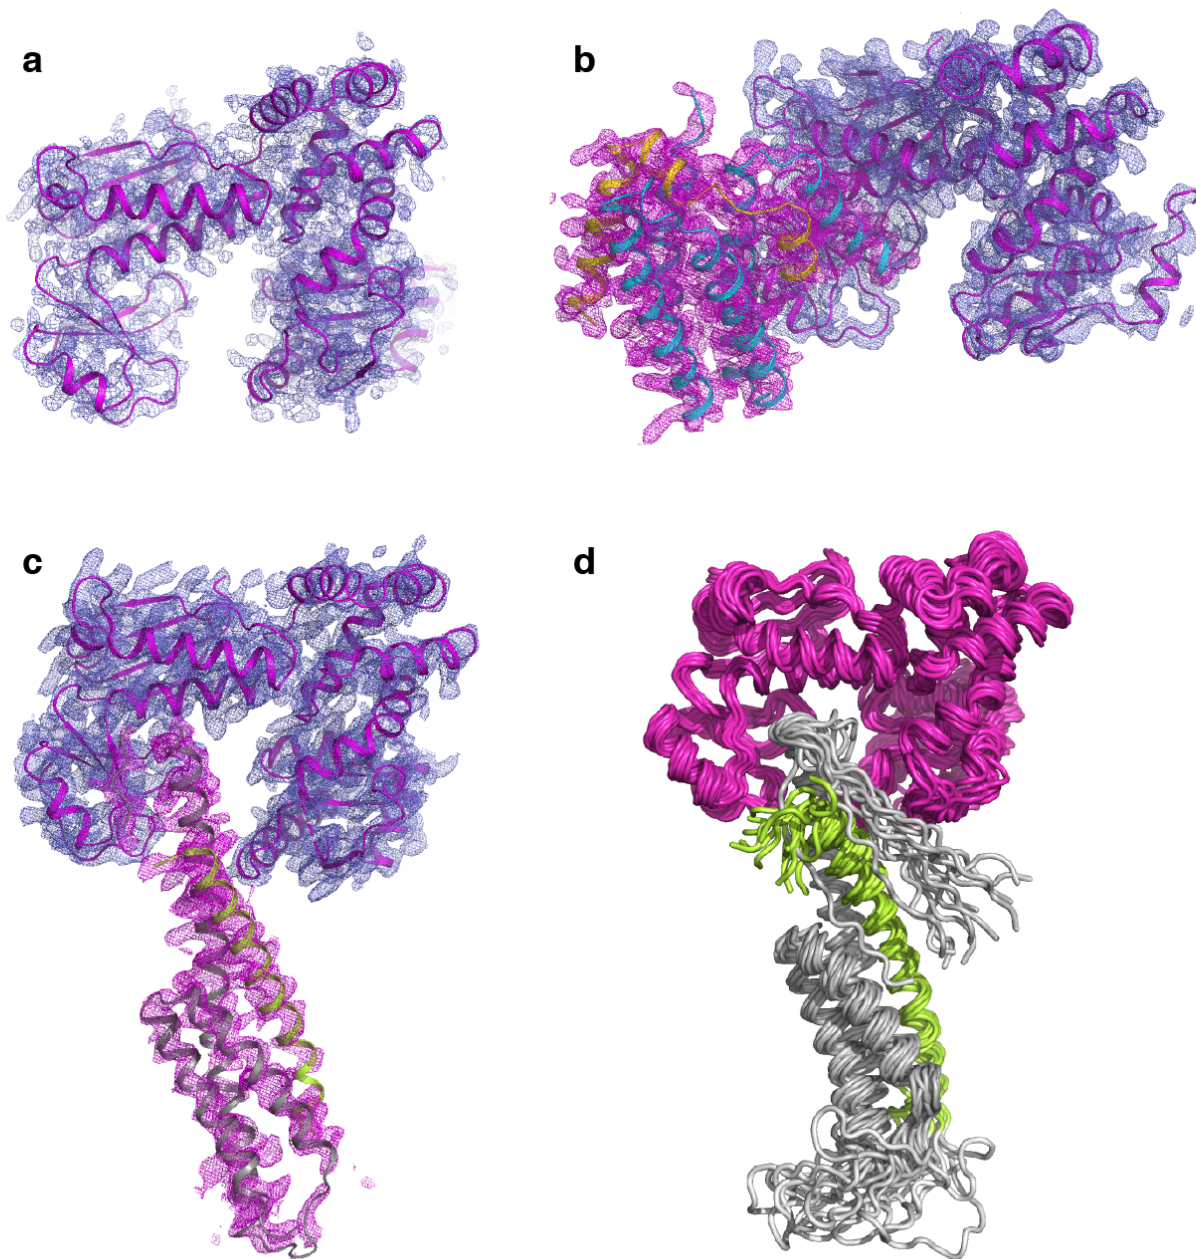

**Supplementary Figure 11. Electron density maps and ensemble of the protein structures.**

**(a)** Stereo view of FlhA<sup>C</sup> with the 2Fo-Fc electron density map with contour at 1.2 sigma level. **(b)** Stereo view of FlhA<sup>C</sup> in complex with FliS-FliC with contour at 1.0 sigma level. **(c)** Stereo view of FlhA<sup>C</sup> in complex with FliT-FliD with contour at 1.0 sigma level. **(d)** Ensemble of the 15 lowest-energy NMR structural conformers of FlhA<sup>C</sup>-FliT-FliD<sup>C</sup>.

**Supplementary Table 1: NMR and refinement statistics for protein structure**

| <b>FlhA<sup>c</sup>-FltT-FltD</b>                              |                 |
|----------------------------------------------------------------|-----------------|
| NMR distance and dihedral constraints                          |                 |
| Total NOE                                                      | 2017            |
| Intra-molecular                                                |                 |
| intra-residue [i = j]                                          | 121             |
| sequential [ i - j  = 1]                                       | 690             |
| medium range [1 <  i - j  < 5]                                 | 686             |
| long range [ i - j  ≥ 5]                                       | 1113            |
| Inter-molecular                                                |                 |
| NOE constraints per restrained residue                         | 4.23            |
| Hydrogen bond                                                  | 298             |
| Total dihedral angle restraints (°)                            | 914             |
| phi                                                            | 457             |
| psi                                                            | 457             |
| Intermolecular PRE restraints                                  | 690             |
| Total number of restricting constraints                        | 3859            |
| Total number of restricting constraints per restrained residue | 8.1             |
| Restricting long-range constraints per restrained residue      | 2.5             |
| Structure statistics                                           |                 |
| <i>Violations (mean ± s.d.)</i>                                |                 |
| Distance constraints (Å)                                       | 0.00016±0.00422 |
| Dihedral-angle constraints (°)                                 | 0.0038 ± 0.0944 |
| Max.distance-constraint violation (Å)                          | 0.26            |
| Max.dihedral-angle violation (°)                               | 8.23            |
| <i>Deviations from idealized geometry</i>                      |                 |
| Bond lengths (Å)                                               | 0.02            |
| Bond angles (°)                                                | 1.2             |
| Improper (°)                                                   | 0               |
| <i>Average pairwise r.m.s. deviation (Å)<sup>a</sup></i>       |                 |
| Heavy                                                          | 1.8             |
| Backbone                                                       | 1.5             |

NOE, nuclear Overhauser effect; PRE, paramagnetic relaxation enhancement; s.d., standard deviation; r.m.s.d., root mean squared deviation.

<sup>a</sup>Pairwise r.m.s. deviation was calculated among 20 refined structures.

**Supplementary Table 2. X-ray Data collection and refinement statistics for protein structures.**

|                              | FlhA <sup>c</sup>             | FlhA <sup>c</sup> -Flit-Flid  | FlhA <sup>c</sup> -Flis-Flid                  |
|------------------------------|-------------------------------|-------------------------------|-----------------------------------------------|
| <i>Data collection</i>       |                               |                               |                                               |
| Wavelength                   | 0.979                         | 0.979                         | 0.979                                         |
| Resolution range (Å)         | 19.91 - 1.90<br>(1.97 - 1.90) | 48.38 - 2.75<br>(2.85 - 2.75) | 58.66 - 2.62<br>(2.71 - 2.62)                 |
| Space group                  | P1                            | P1                            | P2 <sub>1</sub> 2 <sub>1</sub> 2 <sub>1</sub> |
| Cell parameters              |                               |                               |                                               |
| a, b, c (Å)                  | 40.38 49.97 50.95             | 49.11 77.59 119.27            | 73.30 88.62 117.33                            |
| α, β, γ (°)                  | 78.04 68.99 80.66             | 86.88 89 84.27                | 90 90 90                                      |
| Total reflections            | 71114 (6494)                  | 86834 (8769)                  | 117298 (5856)                                 |
| Unique reflections           | 53731 (2729)                  | 42252 (4240)                  | 23031 (1835)                                  |
| Multiplicity                 | 1.3 (1.3)                     | 2.1 (2.1)                     | 5.1 (3.0)                                     |
| Completeness (%)             | 96.09 (95.22)                 | 92.9 (93.4)                   | 97.0 (79.2)                                   |
| I/σ(I)                       | 9.08 (1.00)                   | 9.6 (1.3)                     | 14.7 (0.9)                                    |
| R-merge (%)                  | 4.37 (60.75)                  | 5.35 (63.4)                   | 9.48 (134)                                    |
| R-meas (%)                   | 6.18 (85.91)                  | 7.30 (86.4)                   | 10.55 (162)                                   |
| R-pim (%)                    | 4.37 (60.75)                  | 4.93 (58.4)                   | 4.53 (89.6)                                   |
| CC <sub>1/2</sub>            | 0.997 (0.512)                 | 0.998 (0.698)                 | 0.998 (0.291)                                 |
| <i>Refinement</i>            |                               |                               |                                               |
| Reflections                  | 27443 (2727)                  | 42252 (4239)                  | 22908 (1835)                                  |
| R-free                       | 1297 (143)                    | 2064 (183)                    | 1170 (91)                                     |
| R-work                       | 19.33 (31.83)                 | 21.23 (34.81)                 | 22.25 (38.54)                                 |
| R-free                       | 23.34 (34.94)                 | 26.95 (41.28)                 | 25.05 (42.36)                                 |
| Number of non-hydrogen atoms | 2810                          | 11219                         | 3752                                          |
| macromolecules               | 2574                          | 11170                         | 3746                                          |
| ligands                      | 32                            | 12                            |                                               |
| water                        | 204                           | 37                            | 6                                             |
| Protein residues             | 332                           | 1427                          | 484                                           |
| r.m.s. deviation             |                               |                               |                                               |
| Bond lengths (Å)             | 0.005                         | 0.003                         | 0.002                                         |
| Bond angles (°)              | 0.63                          | 0.63                          | 0.53                                          |
| Ramachandran plot            |                               |                               |                                               |
| Favored (%)                  | 99.09                         | 96.87                         | 96.22                                         |
| Allowed (%)                  | 0.91                          | 3.13                          | 3.78                                          |
| Outliers (%)                 | 0.00                          | 0.00                          | 0.00                                          |
| Average B-factor             | 39.61                         | 94.59                         | 72.39                                         |
| macromolecules               | 39.07                         | 94.68                         | 72.43                                         |
| ligands                      | 54.65                         | 108.25                        | -                                             |
| solvent                      | 43.99                         | 61.93                         | 45.67                                         |

Statistics for the highest-resolution shell are shown in parentheses.

**Supplementary Table 3. Oligonucleotide primers used in this study.**

| Primers                              | Company       | Forward sequence                                                                             | Reverse sequence                                 |
|--------------------------------------|---------------|----------------------------------------------------------------------------------------------|--------------------------------------------------|
| <b>FlhA</b>                          |               |                                                                                              |                                                  |
| FlhA <sup>C-linker</sup>             | Sigma-Aldrich | 5'-GGCGCCCATATGCGTGGTCTGTAAGAAAA GC-3'                                                       | 5'-CGTATGACCGCAACGATTGGTGGCAAATGACTCGAGG-3'      |
| FlhA <sup>C</sup>                    | Sigma-Aldrich | 5'-GCCCATATGGAAGACTACTGGGCATGGAAG-3'                                                         | 5'-CGTATGACCGCAACGATTGGTGGCAAATGACTCGAGG-3'      |
| FlhA <sup>C</sup> I440A              | Sigma-Aldrich | 5'-GTTGGCTGGCAGCTAATCCGGGTAC-3'                                                              | 5'-GTACCCGGATTAGCTGCCAGCCAAC-3'                  |
| FlhA <sup>C</sup> D456V              | Sigma-Aldrich | 5'-GGGTGAAAAAACCGTTGTGCCGGCATT TGGTCTGGACGC-3'                                               | 5'-GCGTCCAGACCAAATGCCGGCACAACGGTTTTTCACCC-3'     |
| FlhA <sup>C</sup> F459A              | Sigma-Aldrich | 5'-GAAAAAACCGTTGATCCGGCAGCCGGT CTGGACGCTATTTG-3'                                             | 5'-CAAATAGCGTCCAGACCGGCTGCCGGA TCAACGGTTTTTTC-3' |
| FlhA <sup>C</sup> L461A              | Sigma-Aldrich | 5'-GATCCGGCATTGGTGGCCGACGCTATT TG -3'                                                        | 5'-CAAATAGCGTCCGGACCAAATGCCGGATC-3'              |
| FlhA <sup>C</sup> V482K              | Sigma-Aldrich | 5'-CAAATTCAGGGCTTCACGGTCAAAGAA GCAAGTACCGTTG-3'                                              | 5'-CAACGGTACTTGCTTCTTTGACCGTGAAGCCCT GAATTTG-3'  |
| FlhA <sup>C</sup> T490M              | Sigma-Aldrich | 5'-CAAGTACCGTTGTCGCTATGCATCTGAACCAC -3'                                                      | 5'-GTGGTTCAGATGCATAGCGACAACGGTACTTG-3'           |
| FlhA <sup>C</sup> S637C              |               | 5'-CAGGAAGCACTGTGCCGCCAGGAAATGCT-3'                                                          | 5'-AGCATTTCTGGCGGCACAGTGCTTCCTG-3'               |
| FlhA <sup>C</sup> E640K              | Sigma-Aldrich | 5'-CAAACCCAGGAAGCACTGAGCCGCCAG AAAATGCTGGGTG-3'                                              | 5'-CACCCAGCATTTTCTGGCGGCTCAGTGCTT CCTGGGTTTG-3'  |
| FlhA <sup>C</sup> E640K/ M641G/L642G | Sigma-Aldrich | 5'-CAGAAAGCGGTTGGTGCACCGCCG GTCTGCTGGTGAATC-3'                                               | 5'-ACCGCCTTCTGGCGGCTCAGTGCTTC CTGGGTTTG-3'       |
| <b>FliT</b>                          |               |                                                                                              |                                                  |
| FliT                                 | Sigma-Aldrich | 5'-GCCCATATGACCTCAACGGTGAATTTATC-3'                                                          | 5'-ATCCTCGAGATCCTCACGACGCA-3'                    |
| FliT Q26C                            | Sigma-Aldrich | 5'-TGGAACCTGGCTTGCCGTGGTGAATGGGATC-3'                                                        | 5'-GATCCCATTACCACGGCAAGCCAGTTCCAG-3'             |
| FliT I93D                            | Sigma-Aldrich | 5'- GAACTGAGCTCTCTGGACGGCCAGTCAACCC GCCAAAAATC-3'                                            | 5'-GATTTTGGCGGGTTGACTGGCCGTCCAGAGA GTCAGTTC-3'   |
| FliT R98D                            | Sigma-Aldrich | 5'- GATTGGCCAGTCAACCGACCAAAAAATCGCTGA ATAATG-3'                                              | 5'-CATTATTCAGCGATTTTTGGTTCGGTTGACTGGC CAATC-3'   |
| FliT L102D                           | Sigma-Aldrich | 5'- CGCAAAAAATCGGACAATAATGCCTATGGTGC C-3'                                                    | 5'-GCGACCATAGGCATTATTGTCCGATTTTTGGC G-3'         |
| FliT Y106G                           | Sigma-Aldrich | 5'-CGCTGAATAATGCCGGTGGTGCCTGTCG-3'                                                           | 5'-CGACAGGCGACCACCGGCATTATTCAGCG-3'              |
| <b>FliD</b>                          |               |                                                                                              |                                                  |
| FliD                                 | Sigma-Aldrich | 5'-CAGGGCGCCCATATGGCTTCAATTTTCATC-3'                                                         | 5'-GCCCTCGAGTTAGGATTTATTCATCGCGGTG-3'            |
| FliD <sup>C</sup>                    | Sigma-Aldrich | 5'-GCCCATATGTCCATCGACGAAACCGTTG-3'                                                           | 5'-GCCCTCGAGTTAGGATTTATTCATCGCGGTG-3'            |
| FliD Q441C                           | Sigma-Aldrich | 5'- GCAGTTTACGTGCCTGGATAACCATG-3'                                                            | 5'-CATGGTATCCAGGCACGTAAACTGC-3'                  |
| <b>FliS</b>                          |               |                                                                                              |                                                  |
| FliS                                 | Sigma-Aldrich | 5'-GCCCATATGTACACGGCGTCAGGTAT-3'                                                             | 5'-GGAGCTCGGATCCGCGGCTTTCTTGAATG-3'              |
| FliS Y10A                            | Sigma-Aldrich | 5'- GTATTAAGGCGGCCCGCCAGTCTC-3'                                                              | 5'-GAGACCTGGGCGGCCCTTAATAC-3'                    |
| FliS V13G                            | Sigma-Aldrich | 5'-GTATGCCAGGGTTCTGTTGAATC-3'                                                                | 5'-GATTCAACAGAACCCTGGGCATAC-3'                   |
| <b>FliC</b>                          |               |                                                                                              |                                                  |
| FliC                                 | Sigma-Aldrich | 5'-GCCCATATGATGGCACAAGTCATTAATAC AAACAGCC-3'                                                 | 5'-TCCCTCGAGTCGCGCAATAATGAAAGCACG-3'             |
| FliC <sup>C</sup>                    | Sigma-Aldrich | 5'- GGTACCGCAAGTGGGGCAGGCGTTCTGAG GGAGGGGGCAGCGAAGGAGGTACGTCTGGAG CAACCGAGGACTCTGACTATGCC-3' | 5'-TCCCTCGAGTCGCGCAATAATGAAAGCACG-3'             |
| <b>FlgN</b>                          |               |                                                                                              |                                                  |
| FlgN                                 | Sigma-Aldrich | 5'-GCCCATATGACCCGCTGAGCGAAATC-3'                                                             | 5'-GGATCCTTAGATACTAATCTTTTTACCGCCGC-3'           |
| FlgN Y122G                           | Sigma-Aldrich | 5'-CATCAAGAACCGACCCTGGGTGGTGCAGA-3'                                                          | 5'-GTCTGCACCACCCAGGGTTCGGTCTTGATG-3'             |
